# Supplementary material
Source: Springer Nature journal article supplement (https://www.springermedizin.de/resource/supplementary/12889_2011_3966_MOESM5_ESM.pdf/9491164)
Supplement: MOESM5 [file 9491164]

Table 3 Odds ratios (OR) for use of antidepressants in participants living alone compared to participants not living alone. Data: The Health 2000 Study, n = 3471

| Predictor: living alone<br>(ref.=not alone) | Use of antidepressant medication |             |             |                         |             |             |                                  |              |
|---------------------------------------------|----------------------------------|-------------|-------------|-------------------------|-------------|-------------|----------------------------------|--------------|
|                                             | At baseline                      |             |             | During 7-year follow-up |             |             | Incident 7-year use <sup>a</sup> |              |
|                                             | OR (95% CI)                      |             | % reduction | OR (95% CI)             |             | % reduction | OR (95% CI)                      |              |
| Adjustment in addition to age and gender:   |                                  |             |             |                         |             |             |                                  |              |
| 1.None                                      | 1.61                             | (1.15-2.25) | 0           | 1.81                    | (1.46-2.23) | 0           | 1.71                             | (1.32-2.21)  |
| 2.Psychosocial factors <sup>b</sup>         | 1.43                             | (1.03-1.99) | 30          | 1.71                    | (1.38-2.11) | 12          | 1.67                             | (1.29-2.16)  |
| 3.Sociodemographic factors <sup>c</sup>     | 1.48                             | (1.04-2.09) | 18          | 1.64                    | (1.32-2.05) | 21          | 1.57                             | (1.21-2.05)  |
| 4.Health behaviors <sup>d</sup>             | 1.58                             | (1.25-2.21) | 5           | 1.74                    | (1.41-2.14) | 9           | 1.64                             | (1.26- 2.12) |
| 5.All of the above                          | 1.33                             | (0.93-1.89) | 46          | 1.55                    | (1.23-1.94) | 32          | 1.53                             | (1.16-2.00)  |

<sup>a</sup> New users during the follow-up with no purchases at the baseline (in 2000 or 2001).

<sup>b</sup> Low social support at the workplace, low social support in private life, poor job climate, hostile personality.

<sup>c</sup> Low educational level, low occupational grade, low income, unemployment, urbanicity, living at rent, housing disadvantages.

<sup>d</sup> Regular smoking, alcohol heavy use (>20g women, >40g men), sedentary lifestyle, obesity (BMI >30)
